# Supplementary material for: Toxicological assessment of multi-walled carbon nanotubes in vitro: potential mitochondria effects on male reproductive cells
Source: PubMed Central journal article supplement (PMC5129931; doi:10.18632/oncotarget.9689), 2016-05-29
Supplement: oncotarget-07-39270-s001.pdf [file oncotarget-07-39270-s001.pdf]

## Toxicological assessment of multi-walled carbon nanotubes *in vitro*: potential mitochondria effects on male reproductive cells

### Supplementary Material

Supplement table 1: Primers used in gene expression analysis

| Primers                        | Sequence                          |
|--------------------------------|-----------------------------------|
| mt-Nd1 F                       | 5'-TCCGAGCATCTTATCCACGC-3'        |
| mt-Nd1 R                       | 5'-GTATGGTGGTACTCCCGCTG-3'        |
| mt-Nd2 F                       | 5'-ATCCTCCTGGCCATCGTACT-3'        |
| mt-Nd2 R                       | 5'-ATCAGAAGTGGAATGGGGCG-3'        |
| mt-Nd3 F                       | 5'-TTGCATTCTGACTCCCCAA-3'         |
| mt-Nd3 R                       | 5'-GACGTGCAGAGCTTGTAGGG-3'        |
| mt-Nd4 F                       | 5'-TAATCGCACATGGCCTCACA-3'        |
| mt-Nd4 R                       | 5'-GCTGTGGATCCGTTCGTAGT-3'        |
| mt-Nd41 F                      | 5'-TAGTATATCGCTCACACCTC-3'        |
| mt-Nd41 R                      | 5'-GTAGTCTAGGCCATATGTG-3'         |
| mt-Nd5 F                       | 5'-TAACCGCATCGGAGACATCG-3'        |
| mt-Nd5 R                       | 5'-GTGGAGGCCAAATTGTGCTG-3'        |
| mt-Nd6 F                       | 5'-GGATTGGGGTAGCGGCAATA-3'        |
| mt-Nd6 R                       | 5'-CCGCAAACAAGATCACCCA-3'         |
| mt-Cytb F                      | 5'-ACGCAAACGGAGCCTCAATA-3'        |
| mt-Cytb R                      | 5'-CCTCATGGAAGGACGTAGCC-3'        |
| mt-Co1 F                       | 5'-GCTAGCCGCAGGCATTACTA-3'        |
| mt-Co1 R                       | 5'-CTCCTCCAGCGGGATCAAAG-3'        |
| mt-Co2 F                       | 5'-AACCGAGTTCGTTCTGCCAAT-3'       |
| mt-Co2 R                       | 5'-CTAGGGAGGGGACTGCTCAT-3'        |
| mt-Co3 F                       | 5'-AGCCTTTTCAGCCCTCCTTC-3'        |
| mt-Co3 R                       | 5'-GTGGCCTTGGTAGGTTCCCTT-3'       |
| mt-Atp6 F                      | 5'-GCAGTCCGGCTTACAGCTAA-3'        |
| mt-Atp6 R                      | 5'-GGTAGCTGTTGGTGGGCTAA-3'        |
| mt-Atp8 F                      | 5'-ACAAACATTCCCCTGGCAC-3'         |
| mt-Atp8 R                      | 5'-TTGGGGTAATGAATGAGGCAA-3'       |
| 18S ribosomal RNA F            | 5'-GGGAGCCTGAGAAACGGC-3'          |
| 18S ribosomal RNA R            | 5'-GGGTCGGGAGTGGGTAATTT-3'        |
| 8.7-kb fragment F              | 5'-TTGAGACTGTGATTGGCAATGCCT-3'    |
| 8.7-kb fragment R              | 5'-CCTTTAATGCCCATCCCGGACT-3'      |
| 6.5-kb fragment F              | 5'-TATCTCTCTTCTTCACTTCTCCCCTGG-3' |
| 6.5-kb fragment R              | 5'-CGTGATGCCGCGTTGAGGGTCTCCTG-3'  |
| 10-kb mitochondria fragment F  | 5'-GCCAGCCTGACCCATAGCCATATTAT-3'  |
| 10-kb mitochondria fragment R  | 5'-GAG AGATTTTATGGGTGTATTGCGG-3'  |
| 117-bp mitochondria fragment F | 5'-CCC AGCTACTACCATCATTCAAGT-3'   |

117-bp mitochondria fragment R 5'-GATGGTTTGGGAGATTGGTTGATG-3'

---

F: forward; R: reverse

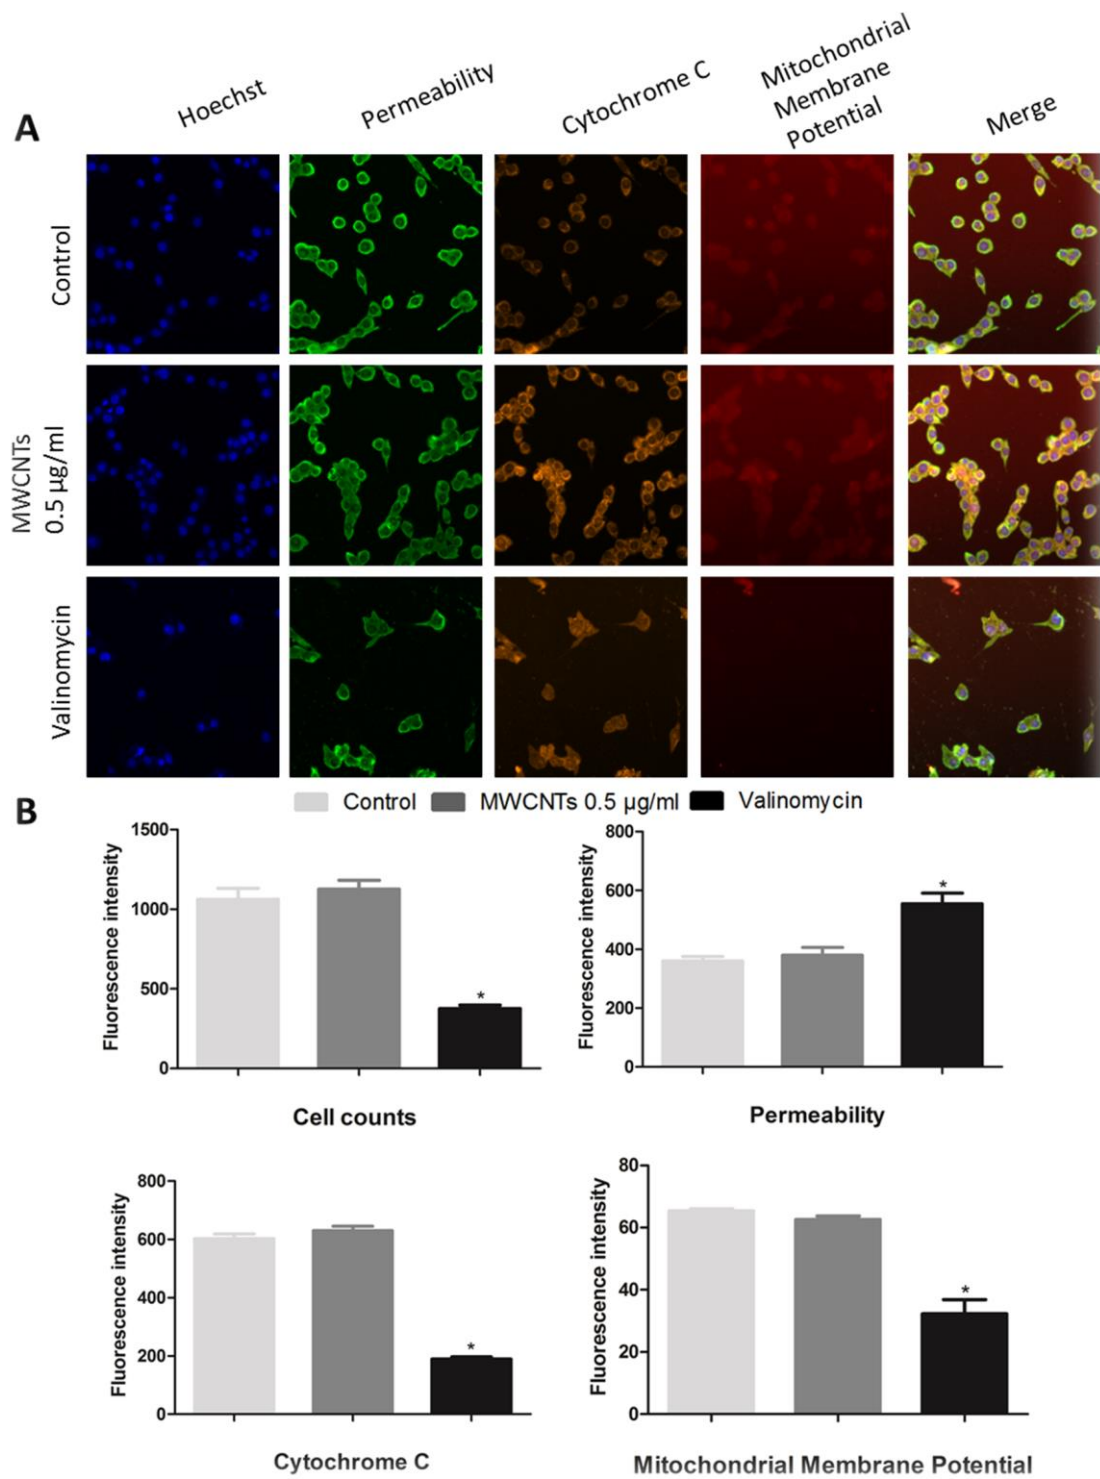

**Figure S1:** High content screening (HCS) assays. The images (A) and values (B) of permeability, mitochondrial membrane potential and cytochrome c in GC-2spd cells were captured and analyzed by HCS after MWCNTs exposure. Significance indicated by: \* $p < 0.05$ , versus control.
